# Supplementary material for: Revisiting the Role of Transcription Factors in Coordinating the Defense Response Against Citrus Bark Cracking Viroid Infection in Commercial Hop (Humulus Lupulus L.)
Source: MDPI journal article supplement (doi:10.3390/v11050419), 2019-05-05

# AP2 TF

■ motif 1 
 ■ motif 2 
 ■ motif 3 
 ■ motif 4 
 ■ motif 5 
 ■ motif 6 
 ■ motif 7 
 ■ motif 8 
 ■ motif 9 
 ■ motif 10

Motif 1

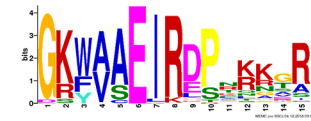

Motif 2

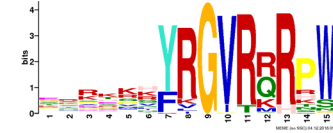

Motif 3

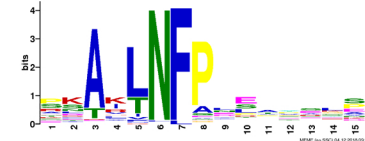

Motif 4

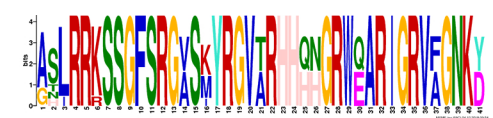

Motif 5

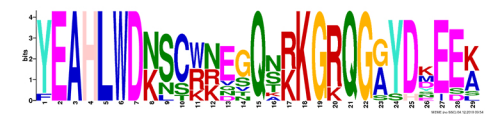

Motif 6

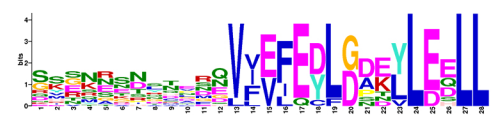

Motif 7

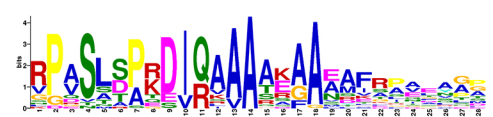

Motif 8

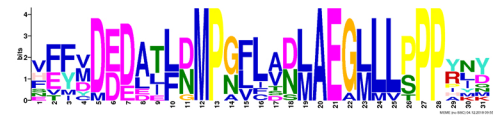

Motif 9

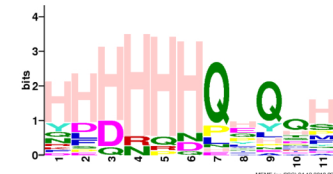

Motif 10

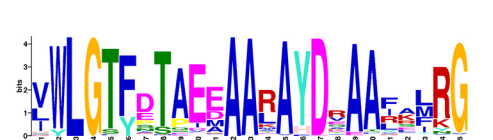

# bHLH TF

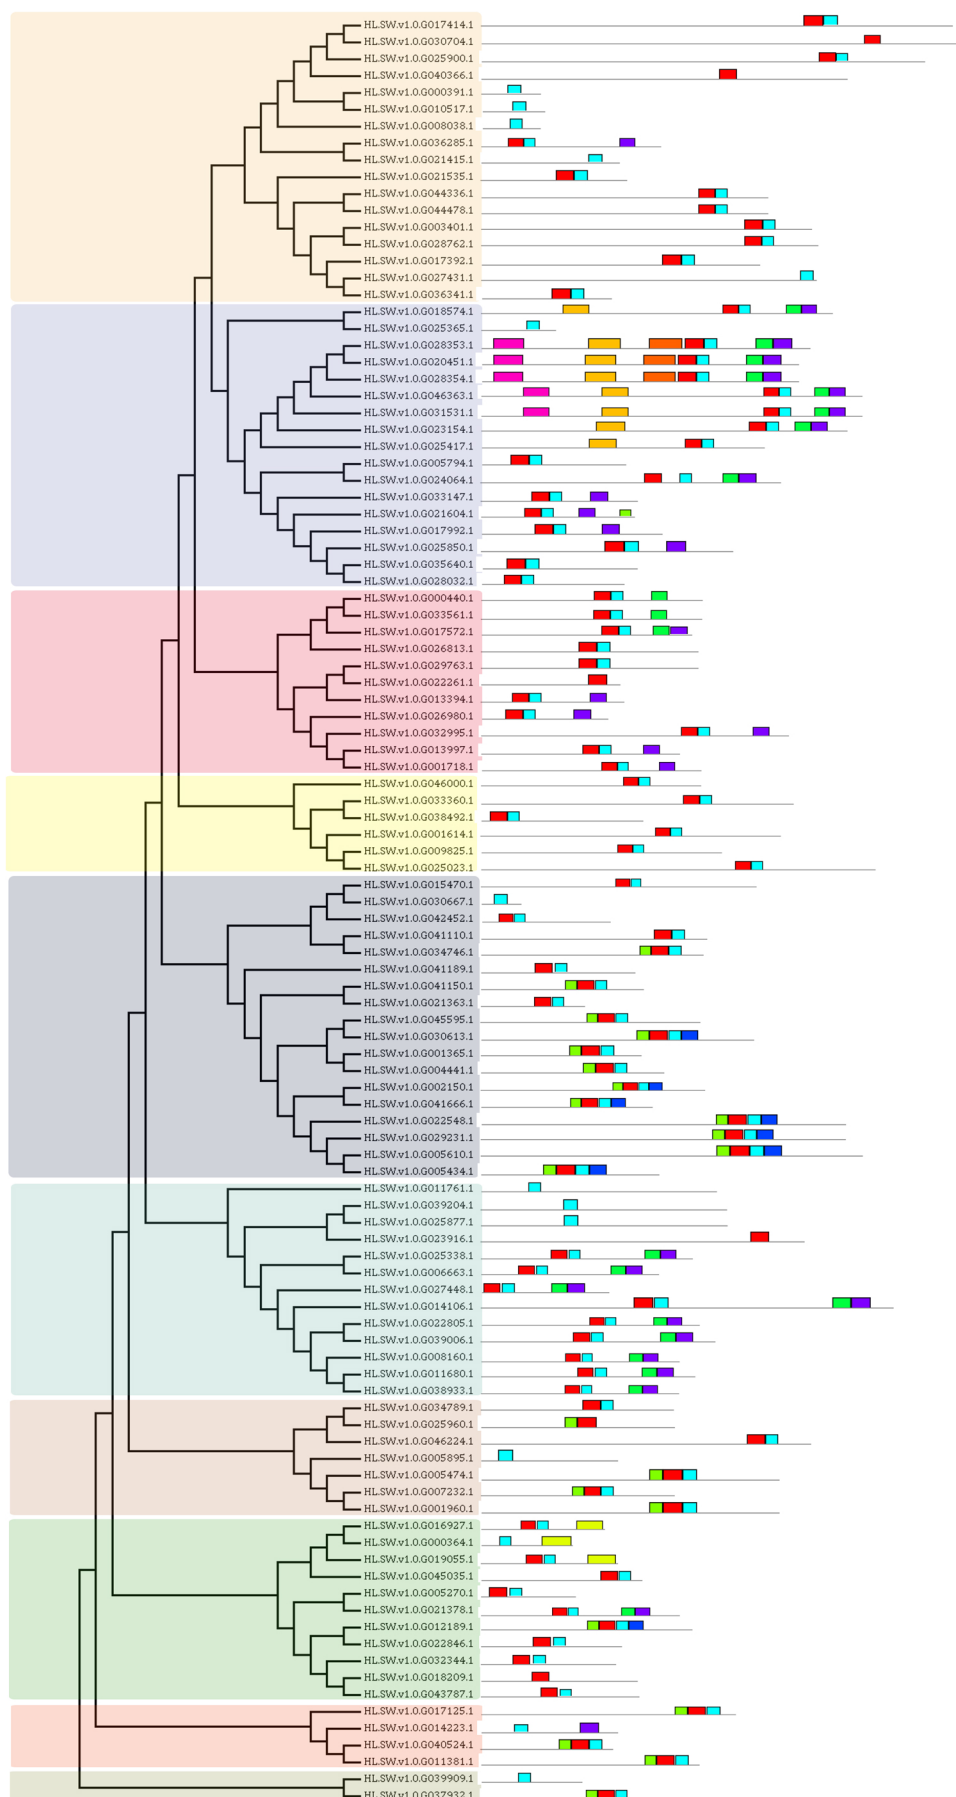

■ motif 1
 ■ motif 2
 ■ motif 3
 ■ motif 4
 ■ motif 5  
■ motif 6
 ■ motif 7
 ■ motif 8
 ■ motif 9
 ■ motif 10

## Motif 1

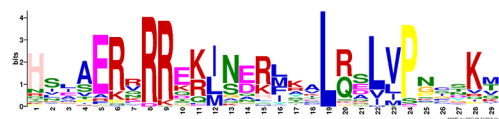

## Motif 2

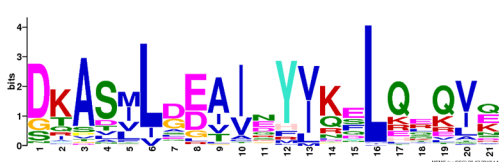

## Motif 3

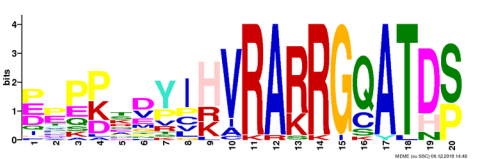

## Motif 4

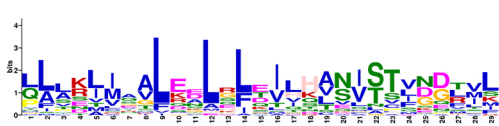

## Motif 5

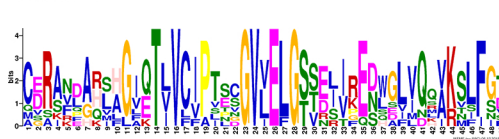

## Motif 6

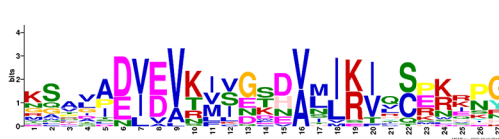

## Motif 7

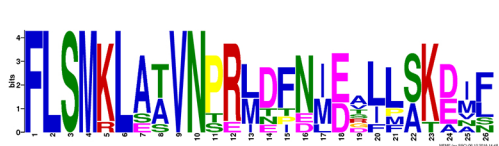

## Motif 8

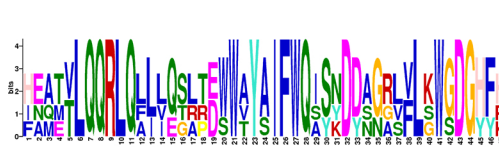

## Motif 9

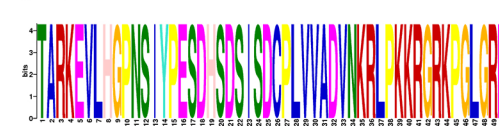

## Motif 10

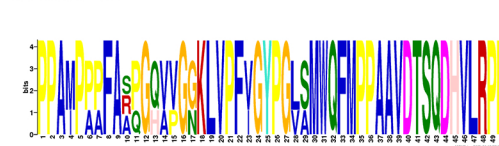

## bZIP TF

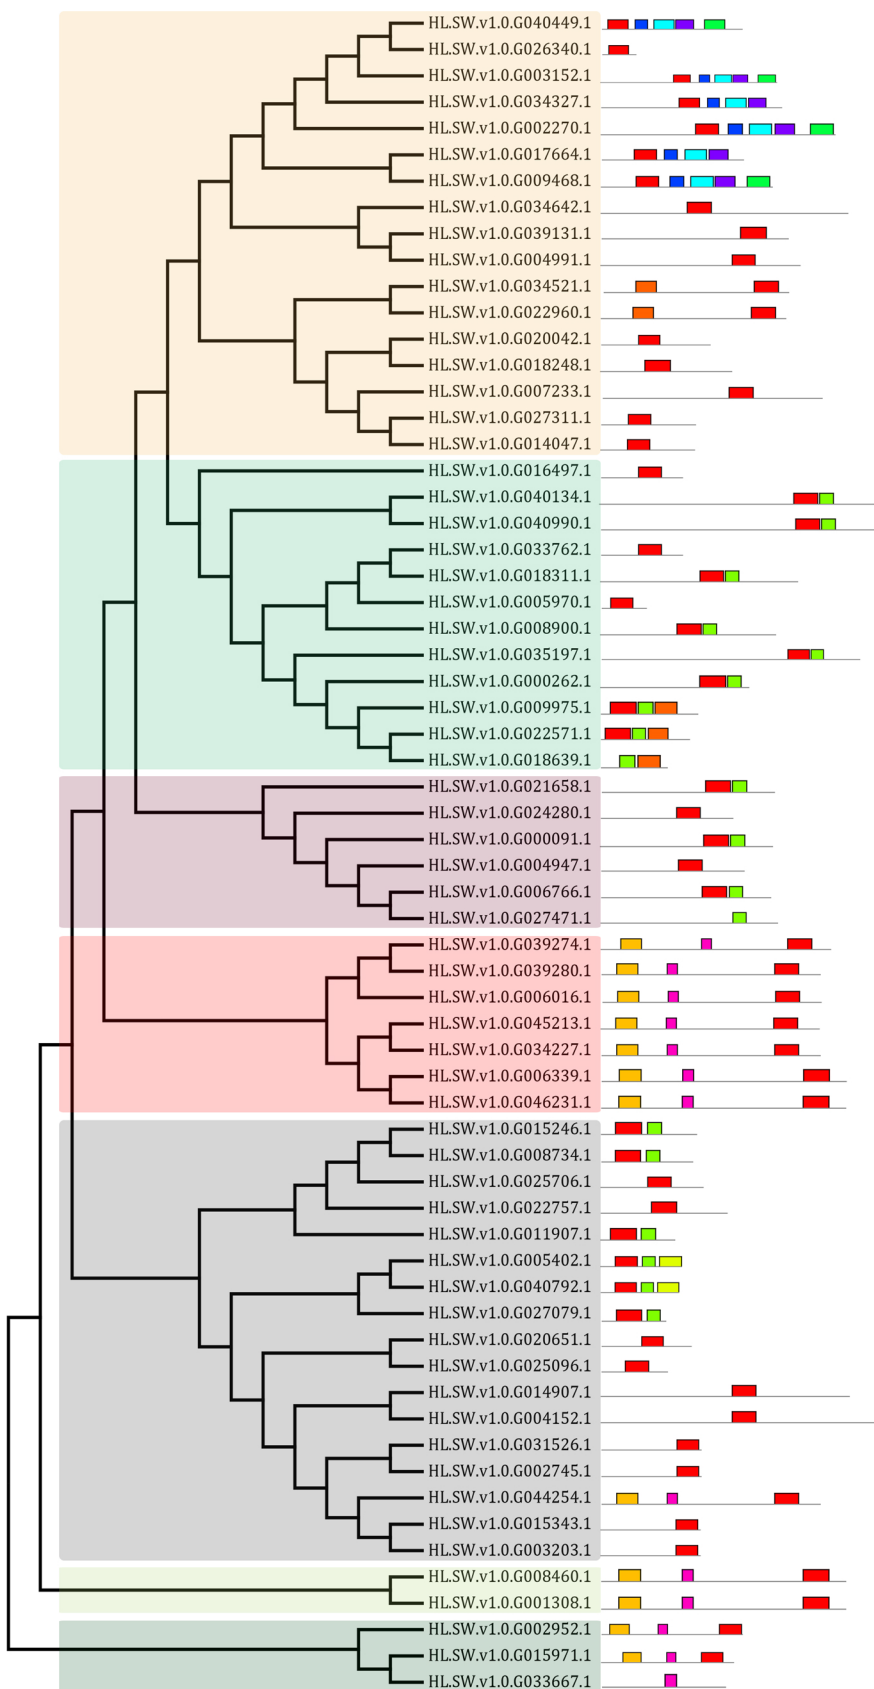

■ motif 1 ■ motif 2 ■ motif 3 ■ motif 4 ■ motif 5  
■ motif 6 ■ motif 7 ■ motif 8 ■ motif 9 ■ motif 10

### Motif 1

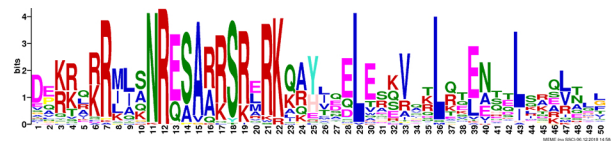

### Motif 2

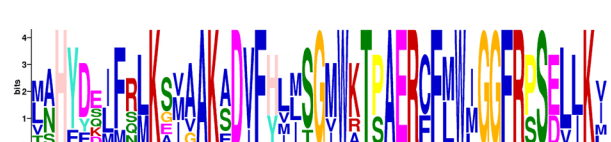

### Motif 3

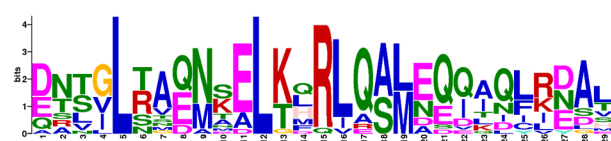

### Motif 4

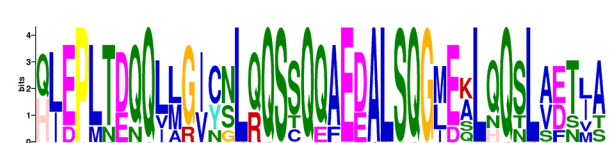

### Motif 5

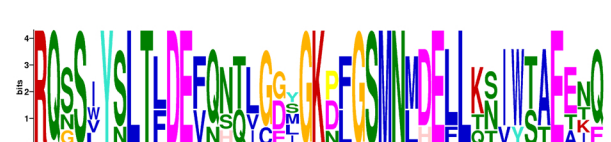

### Motif 6

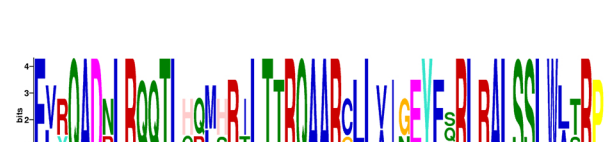

### Motif 7

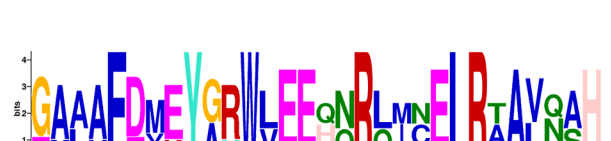

### Motif 8

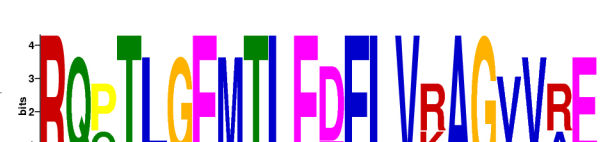

### Motif 9

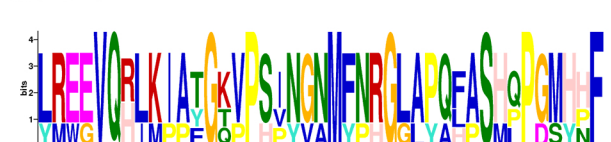

### Motif 10

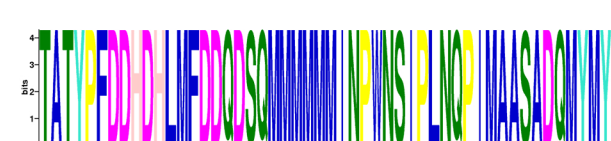



## MYB TF

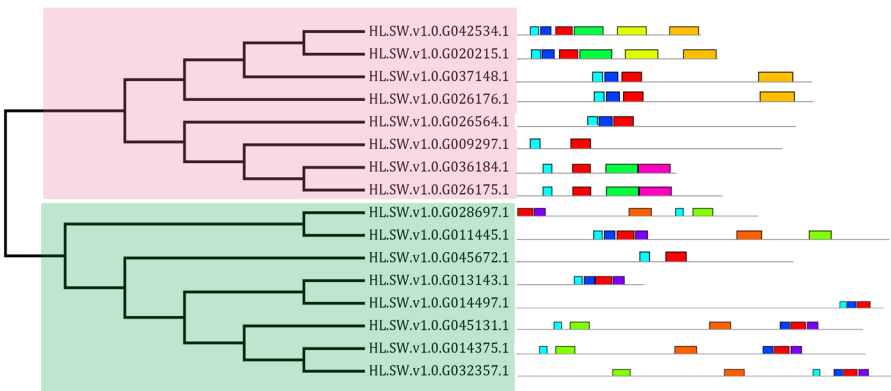

■ motif 1 ■ motif 2 ■ motif 3 ■ motif 4 ■ motif 5  
 ■ motif 6 ■ motif 7 ■ motif 8 ■ motif 9 ■ motif 10

### Motif 1

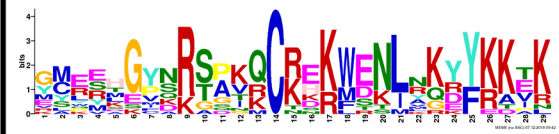

### Motif 2

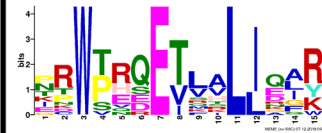

### Motif 3

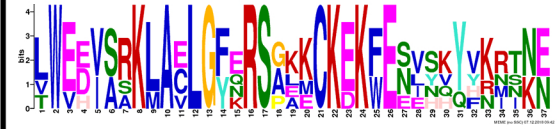

### Motif 4

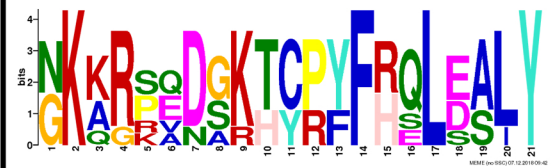

### Motif 5

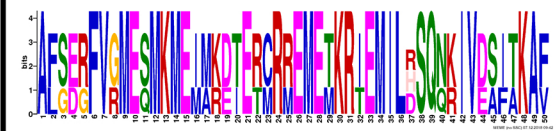

### Motif 6

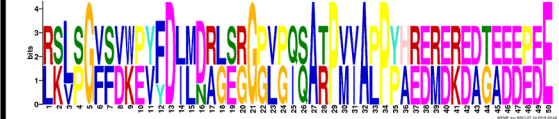

### Motif 7

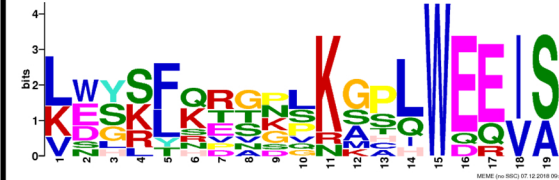

### Motif 8

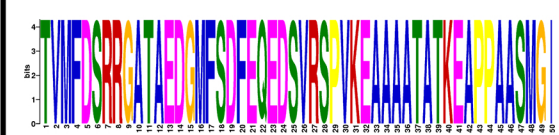

### Motif 9

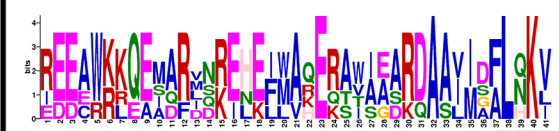

### Motif 10

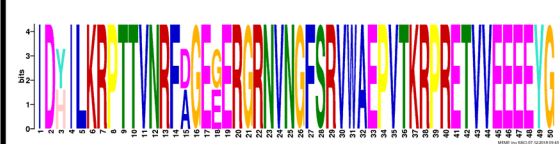



## NAC TF

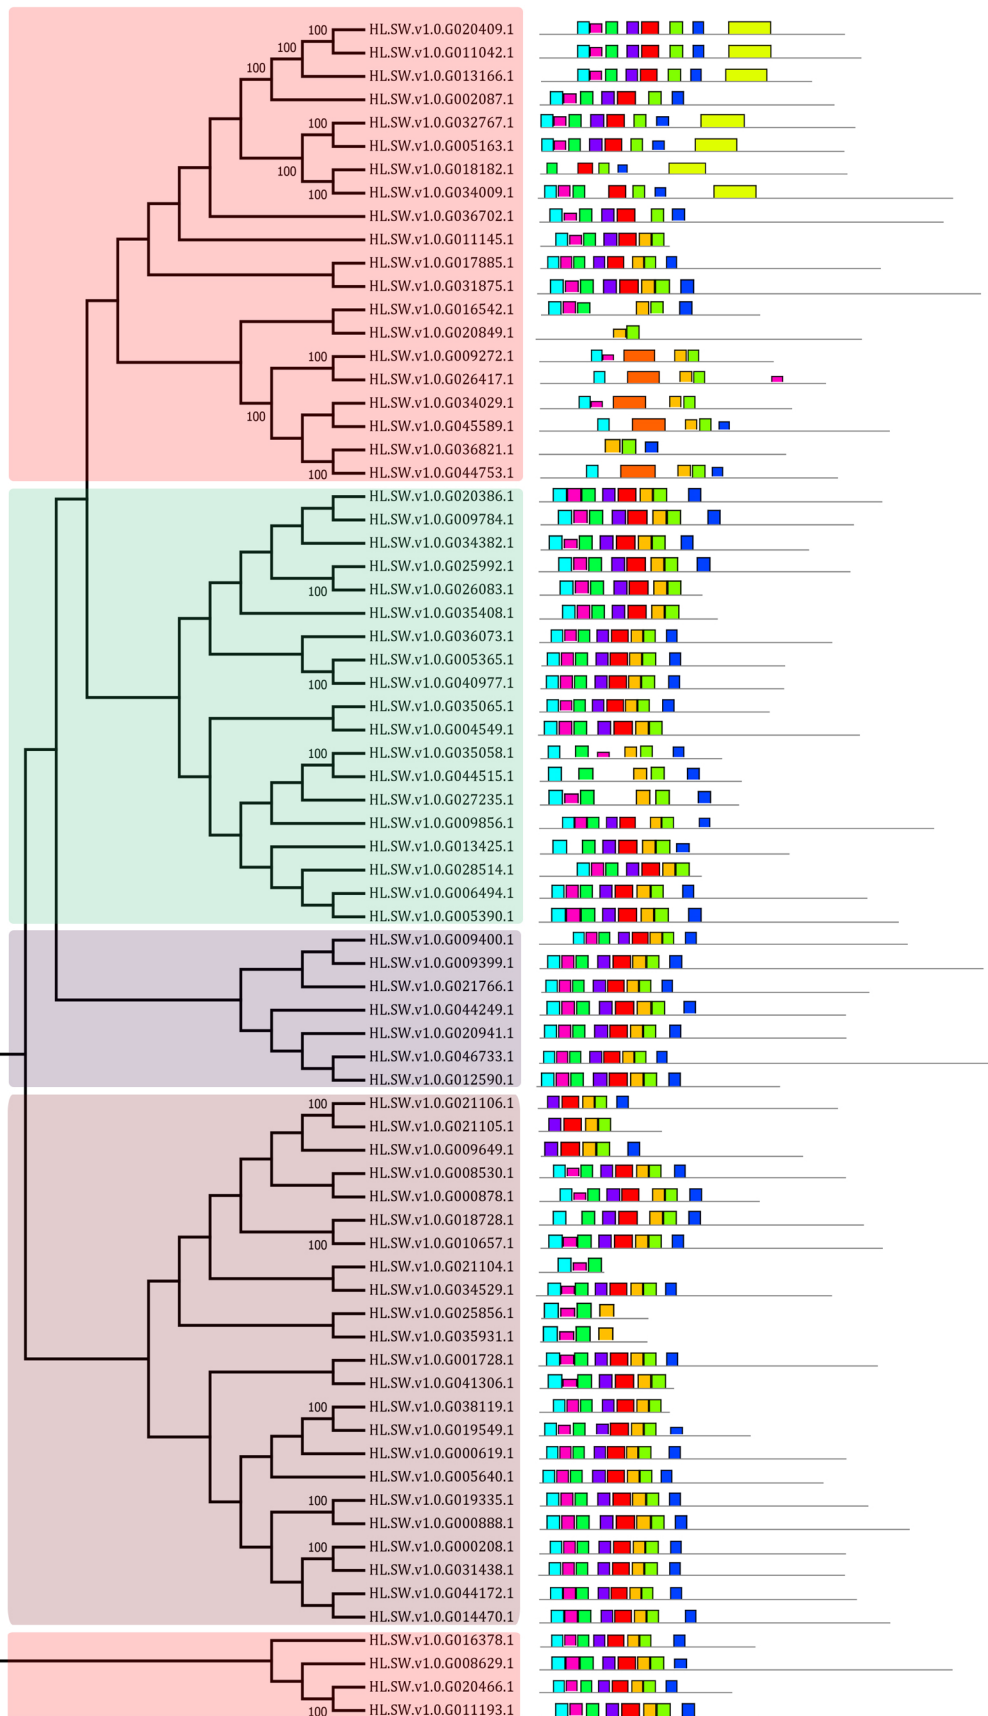

■ motif 1 ■ motif 2 ■ motif 3 ■ motif 4 ■ motif 5  
■ motif 6 ■ motif 7 ■ motif 8 ■ motif 9 ■ motif 10

### Motif 1

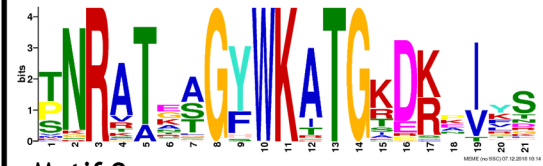

### Motif 2

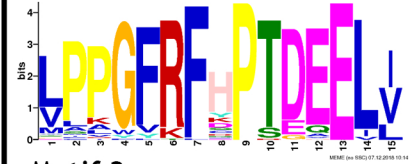

### Motif 3

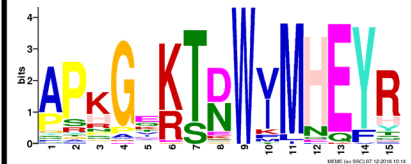

### Motif 4

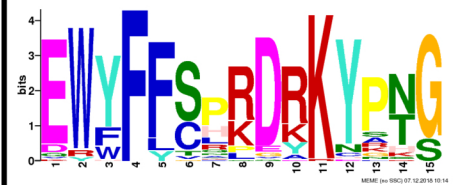

### Motif 5

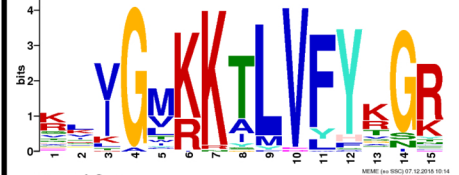

### Motif 6

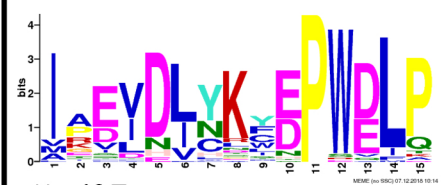

### Motif 7

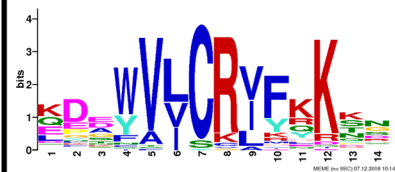

### Motif 8

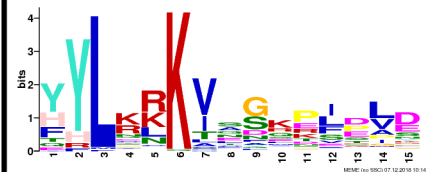

### Motif 9

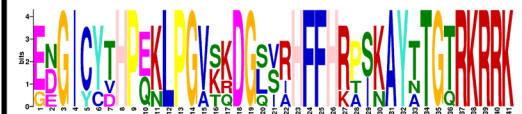

### Motif 10

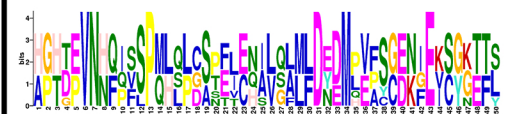

WRKY TF

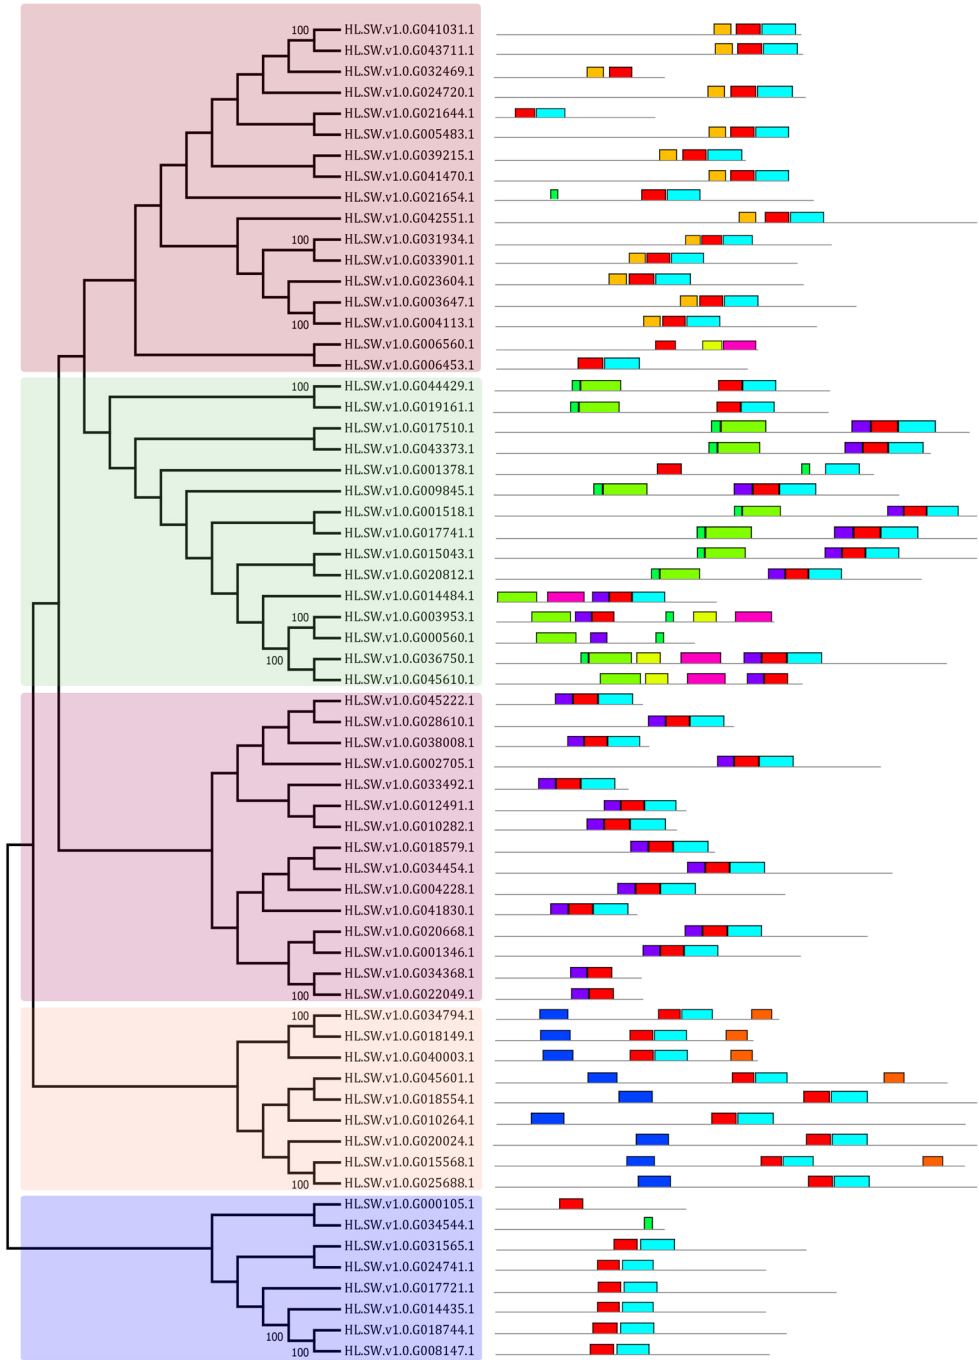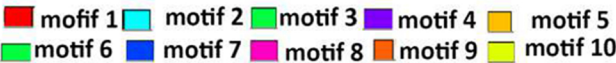

Motif 1

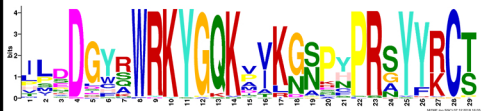

Motif 2

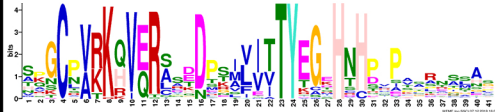

Motif 3

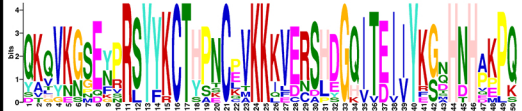

Motif 4

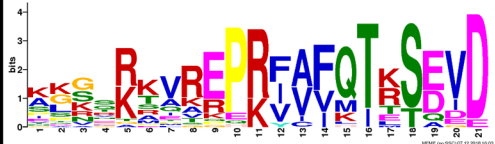

Motif 5

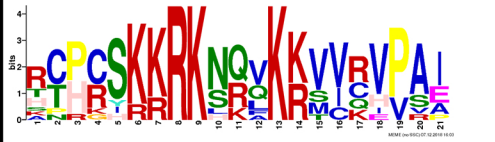

Motif 6

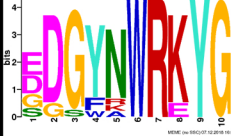

Motif 7

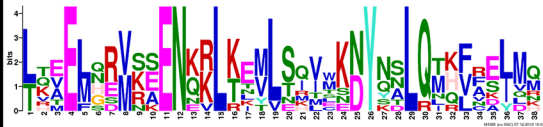

Motif 8

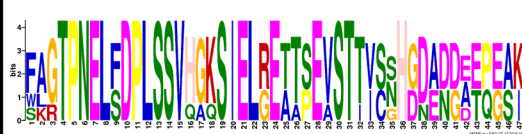

Motif 9

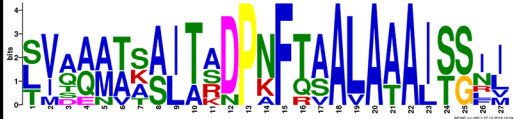

Motif 10

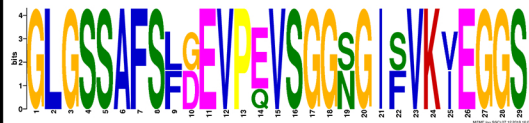

Supplement: s1 [file s1]
